# Supplementary material for: Predicting pesticide vapour pressures: the power of functional groups
Source: Royal Society of Chemistry journal article supplement (doi:10.1039/d5cp01965f), 2025-01-01
Supplement: d5cp01965f1.pdf [file d5cp01965f1.pdf]

# **Supporting Information:**

## **Predicting Pesticide Vapour Pressures: The Power of Functional Groups**

Mark Heezen,<sup>†,‡</sup> Manuel Alcamí,<sup>\*,†</sup> Clemens Rauer,<sup>†</sup> and  
Freija De Vleeschouwer<sup>\*,‡</sup>

<sup>†</sup>*Departamento de Química, C-13, Universidad Autónoma de Madrid, Cantoblanco, 28049  
Madrid, Spain*

<sup>‡</sup>*Department of General Chemistry: Algemene Chemie (ALGC), Vrije Universiteit Brussel,  
Pleinlaan 2, 1050 Brussel, Belgium*

E-mail: manuel.alcami@uam.es; Freija.De.Vleeschouwer@vub.be

# Contents

|                                                   |      |
|---------------------------------------------------|------|
| Pearson coefficient of QM properties              | S-3  |
| Functional group clustering                       | S-6  |
| Hyperparameters                                   | S-8  |
| Correlation between QM properties and SHAP values | S-10 |
| Functional group slopes                           | S-11 |
| References                                        | S-15 |

## Pearson coefficient of QM properties

**Table S1: Pearson coefficient of the correlation between the quantum mechanically calculated property and the vapour pressure**

| QM property                                       | Pearson coefficient |
|---------------------------------------------------|---------------------|
| Gibbs free energy (w)                             | 0.2889              |
| Entropy (w)                                       | 0.2837              |
| Zero point energy (w)                             | -0.4728             |
| Highest occupied molecular orbital (w)            | 0.0903              |
| Lowest unoccupied molecular orbital (w)           | 0.2855              |
| Dipole moment (w)                                 | -0.4893             |
| Dipole moment (g)                                 | -0.4354             |
| Isotropic polarisability (w)                      | -0.6882             |
| Rotational constant 1 (w)                         | 0.3667              |
| Rotational constant 2 (w)                         | 0.3914              |
| Frequency 1 (w)                                   | 0.2203              |
| Frequency 1 (o)                                   | 0.1922              |
| Frequency 1 (g)                                   | 0.1836              |
| HOMO-LUMO gap (g)                                 | 0.2682              |
| $\Delta$ Gibbs free energy (wg)                   | 0.8550              |
| $\Delta$ Entropy (wg)                             | -0.0204             |
| $\Delta$ Heat capacity at constant volume (wg)    | -0.3774             |
| $\Delta$ Zero point energy (wg)                   | 0.5072              |
| $\Delta$ Highest occupied molecular orbital (wg)  | 0.0017              |
| $\Delta$ Lowest unoccupied molecular orbital (wg) | -0.0655             |
| $\Delta$ Dipole moment (wg)                       | -0.3760             |
| $\Delta$ Nuclear repulsion energy (wg)            | -0.0296             |

**Table S1: (continued)**

| QM property                                       | Pearson coefficient |
|---------------------------------------------------|---------------------|
| $\Delta$ Rotational constant 1 (wg)               | -0.0258             |
| $\Delta$ Rotational constant 2 (wg)               | -0.0470             |
| $\Delta$ Rotational constant 3 (wg)               | -0.1033             |
| $\Delta$ Frequency 1 (wg)                         | 0.0274              |
| $\Delta$ Entropy (og)                             | -0.0432             |
| $\Delta$ Heat capacity at constant volume (og)    | -0.3343             |
| $\Delta$ Electronic single point energy (og)      | 0.8300              |
| $\Delta$ Dipole moment (og)                       | -0.3408             |
| $\Delta$ Nuclear repulsion energy (og)            | 0.1864              |
| $\Delta$ Rotational constant 1 (og)               | -0.0178             |
| $\Delta$ Rotational constant 2 (og)               | 0.0036              |
| $\Delta$ Rotational constant 3 (og)               | -0.0261             |
| $\Delta$ Frequency 1 (og)                         | -0.0003             |
| $\Delta$ Gibbs free energy (wo)                   | 0.5356              |
| $\Delta$ Entropy (wo)                             | 0.0209              |
| $\Delta$ Heat capacity at constant volume (wo)    | -0.1315             |
| $\Delta$ Zero point energy (wo)                   | 0.2956              |
| $\Delta$ Highest occupied molecular orbital (wo)  | 0.0500              |
| $\Delta$ Lowest unoccupied molecular orbital (wo) | 0.0000              |
| $\Delta$ Dipole moment (wo)                       | -0.2089             |
| $\Delta$ Nuclear repulsion energy (wo)            | -0.2653             |
| $\Delta$ Rotational constant 1 (wo)               | -0.0160             |
| $\Delta$ Rotational constant 2 (wo)               | -0.0750             |
| $\Delta$ Rotational constant 3 (wo)               | -0.1210             |

**Table S1: (continued)**

| QM property                       | Pearson coefficient |
|-----------------------------------|---------------------|
| $\Delta$ Frequency 1 (wo)         | 0.0431              |
| $\Delta$ Cavity surface area (wo) | 0.3180              |
| $\Delta$ Cavity volume (wo)       | 0.6314              |

## Functional group clustering

The list of functional groups on Checkmol’s website<sup>S1</sup> shows dependencies in the functional groups present. For example, the columns *alcohol*, *primary alcohol*, *secondary alcohol*, and *tertiary alcohol* are present. In this case, the column *alcohol* is the sum of the other three mentioned columns. We looked for these dependencies by hand, since they are not described in the Checkmol documentation. In Checkmol some dependencies could be spotted by functional groups that end in *deriv.*, short for derivative, as part of the group name. All the relationships found between the functional groups present in our database are shown in Table S2. Based on our chemical intuition and taking the trade-off between detail in the model and number of features into account, we decided to either cluster the groups together to the main group or drop the main group and keep the subcategories. This is indicated in the clustered column in Table S2 by *yes* or *no*. In some cases, a functional group appears both as a main category and a subcategory. When marked *yes* for both, this functional group is excluded from the final database and is listed only as part of the overarching functional group to prevent double counting.

After the dependencies have been corrected, we checked whether identical columns were present. If this was the case, one of these columns was dropped. The other column got a name consisting of both columns. This is for example the case for the column that looks into charged functional groups. Since all pesticides are in their neutral form in the database, the column *cation* and *anion* are always equal and therefore merged.

**Table S2: Dependencies in the functional groups that are found in the SEPIA database. The second column is made by summing the categories mentioned in the third column. The cluster column indicates whether the subcategories are kept (*no* clustering) or the main category is kept (clustering, so *yes*).**

| Clustered | Main category                  | Sub categories                                                                                                                                                                                             |
|-----------|--------------------------------|------------------------------------------------------------------------------------------------------------------------------------------------------------------------------------------------------------|
| yes       | carbonyl compound              | aldehyde, ketone                                                                                                                                                                                           |
| no        | hydroxy                        | alcohol, phenol or hydroxyheteroarene                                                                                                                                                                      |
| yes       | alcohol                        | primary alcohol, secondary alcohol, tertiary alcohol, 1,2-diol, 1,2-aminoalcohol                                                                                                                           |
| no        | ether                          | dialkyl ether, alkyl aryl ether, diaryl ether                                                                                                                                                              |
| no        | amine                          | primary amine, secondary amine, tertiary amine                                                                                                                                                             |
| yes       | primary amine                  | primary aliphatic amine (alkylamine), primary aromatic amine                                                                                                                                               |
| yes       | secondary amine                | secondary amine, secondary aliphatic amine (dialkylamine),<br>secondary aliphatic/aromatic amine (alkylarylamine),<br>secondary aromatic amine (diarylamine)                                               |
| yes       | tertiary amine                 | tertiary aliphatic amine (trialkylamine),<br>tertiary aliphatic/aromatic amine (alkylarylamine)                                                                                                            |
| no        | halogen derivative             | alkyl fluoride, alkyl chloride, alkyl bromide, aryl fluoride, aryl chloride,<br>aryl bromide, aryl iodide                                                                                                  |
| yes       | carboxylic acid derivative     | carboxylic acid, carboxylic acid ester, carboxylic acid amide, carboxylic acid<br>hydrazide,<br>carboxylic acid amidine, carboxylic acid imide (N-substituted),<br>carboxylic acid imide (N-unsubstituted) |
| yes       | carboxylic acid amide          | primary carboxylic acid amide, secondary carboxylic acid amide,<br>tertiary carboxylic acid amide                                                                                                          |
| yes       | thiocarboxylic acid derivative | thiocarboxylic acid ester, thiolactone                                                                                                                                                                     |
| yes       | sulfuric acid derivative       | sulfuric acid amide ester, sulfuric acid diamide                                                                                                                                                           |
| yes       | sulfonic acid derivative       | sulfonic acid ester, sulfonamide, sulfone                                                                                                                                                                  |

# Hyperparameters

**Table S3: Tuned hyperparameters of the generated krr models.**

| Feature       | Molecular properties | Functional groups   |
|---------------|----------------------|---------------------|
| Kernel degree | polynomial<br>1      | polynomial<br>3     |
| $\alpha$      | 0.24574538367297724  | 0.613569814052685   |
| $\gamma$      | 9.996760120209307    | 0.10104775081786264 |
| coef0         | 0.10062930271486187  | 1.4889769857045507  |

**Table S4: Tuned hyperparameters of the generated XGboost models.**

| Feature           | Molecular properties | Functional groups  |
|-------------------|----------------------|--------------------|
| Estimators        | 385                  | 135                |
| Maximum depth     | 2                    | 6                  |
| Learning rate     | 0.09990673202049342  | 0.2183777170191625 |
| Subsample         | 0.8276085028744941   | 0.9582867426167475 |
| Colsample by tree | 0.8917249336219539   | 0.5868131315729668 |
| Reg alpha         | 0.2178445187703823   | 0.8183085518481774 |
| Reg lambda        | 1.436398222412372    | 2.7960946484534035 |



## XGBoost SHAP

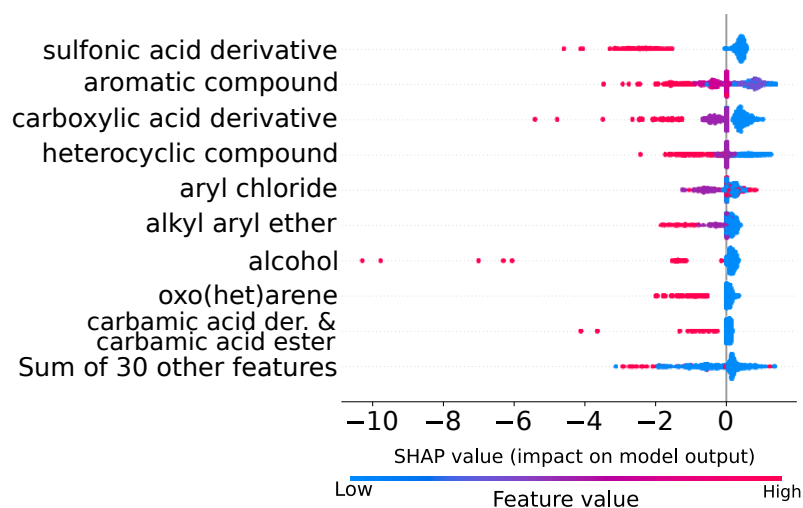

Figure S1: SHAP beeswarm plot for the XGBoost model based on 29 functional groups

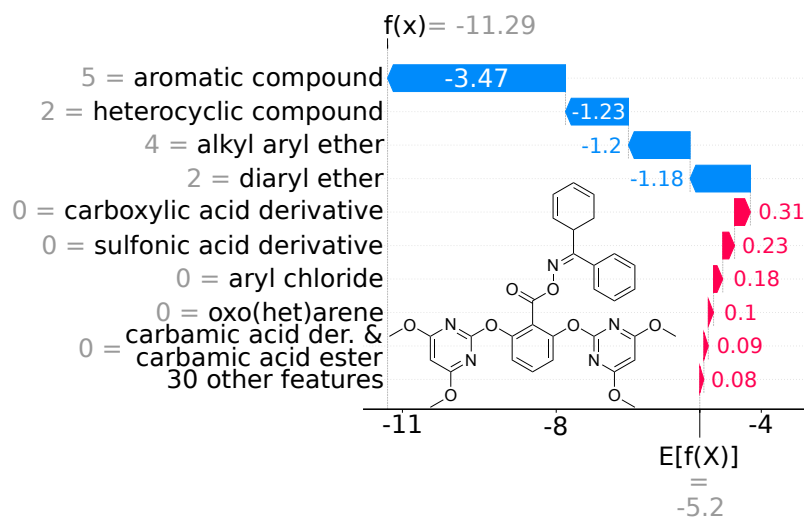

Figure S2: SHAP waterfall plot for pyribenzoxim from the XGBoost model based on 29 functional groups

## Correlation between QM properties and SHAP values

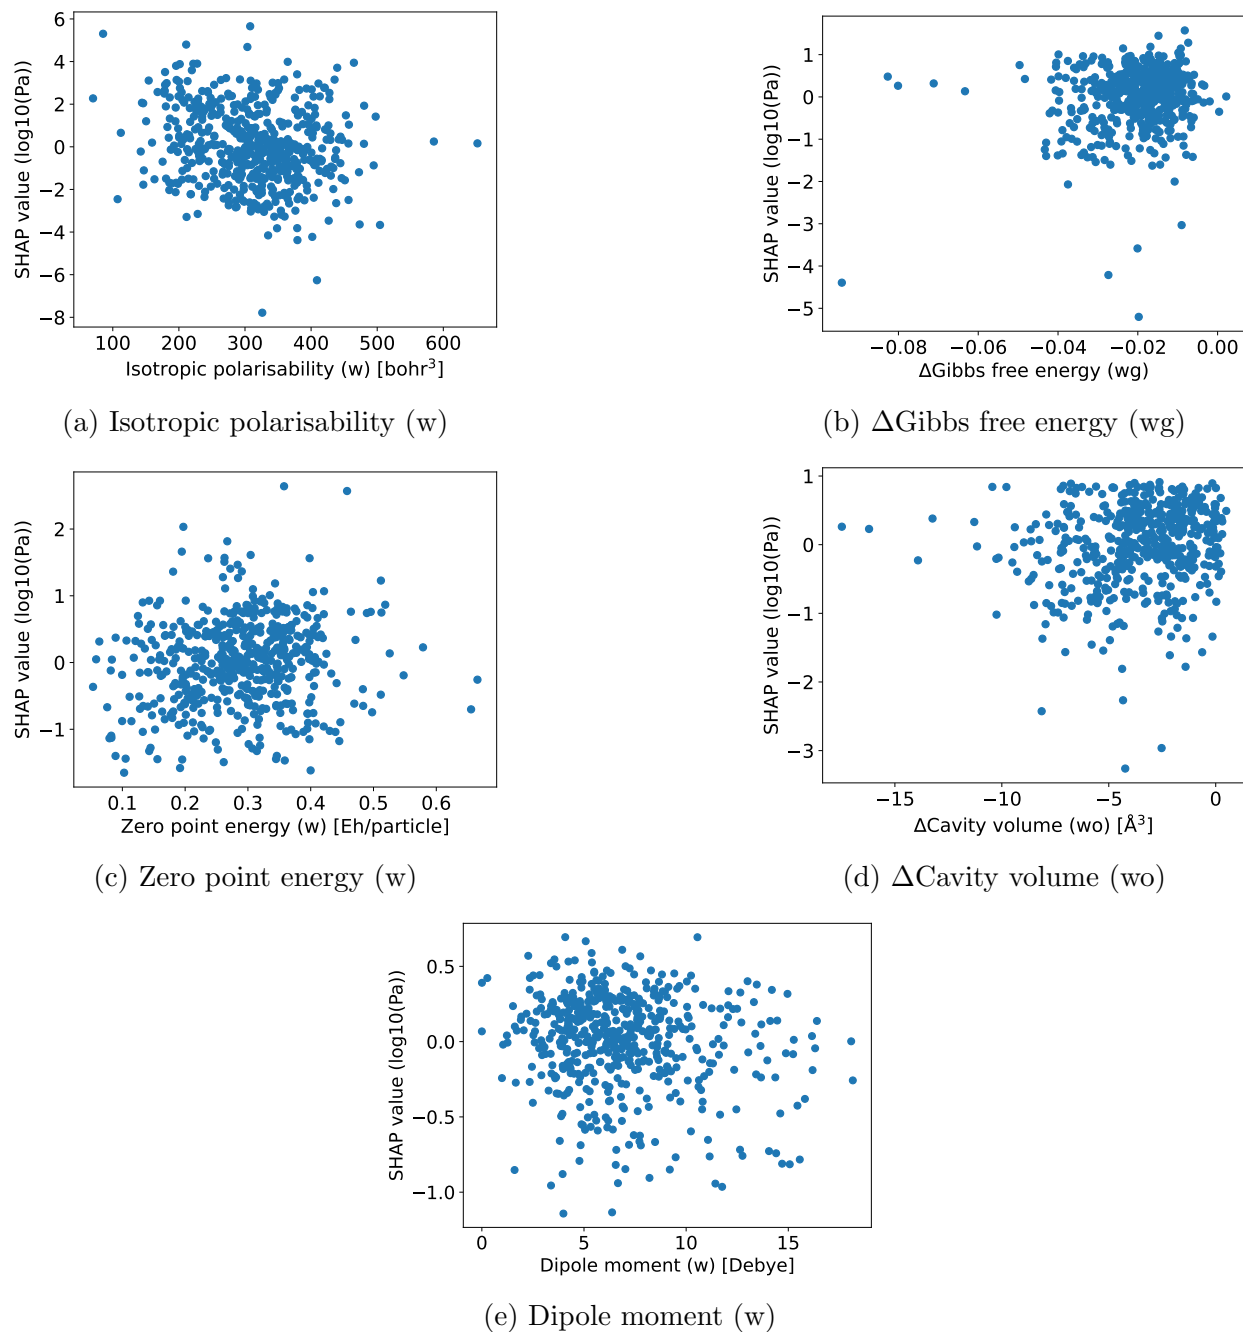

Figure S3: The correlation between the value of the property and its respective SHAP value for the 5 most important QM properties. G, w, and o indicate if the property was calculated without solvation or solvated in water or octanol, respectively.

## Functional group slopes

**Table S5: Slopes for the number of a particular functional groups present vs the SHAP value based on the training set for the krr model**

| Functional group             | slope        | $R^2$ | max. FG | $\Delta$ SHAP |
|------------------------------|--------------|-------|---------|---------------|
| Cation & Anion               | -0.648373668 | 0.894 | 2       | 1.395         |
| Carbonyl ompound             | -0.874390722 | 0.828 | 2       | 3.294         |
| Oxime ether                  | -0.887470008 | 0.884 | 4       | 3.320         |
| Ketene acetal or derivative  | -1.261285091 | 0.959 | 1       | 1.527         |
| Acetal                       | -0.846935919 | 0.555 | 2       | 3.016         |
| Hemiaminal                   | -0.863020671 | 0.824 | 2       | 2.504         |
| Enamine                      | -0.342168544 | 0.775 | 4       | 1.397         |
| Enol                         | -1.967633684 | 0.993 | 2       | 4.214         |
| Enol ether                   | -0.523128315 | 0.988 | 1       | 0.634         |
| Alcohol                      | -0.772416646 | 0.947 | 18      | 14.245        |
| Phenol or Hydroxyheteroarene | 0.544151528  | 0.619 | 2       | 2.610         |
| Dialkyl ether                | -0.173065397 | 0.239 | 2       | 1.345         |
| Alkyl aryl ether             | -0.389781294 | 0.626 | 4       | 2.489         |
| Diaryl ether                 | -0.450452128 | 0.754 | 2       | 1.799         |
| Hydrazine derivative         | -0.892741785 | 0.905 | 1       | 1.574         |
| Primary amine                | -2.015409203 | 0.896 | 2       | 6.578         |
| Tertiary amine               | 0.317113242  | 0.628 | 1       | 0.997         |
| Alkyl fluoride               | -0.453115602 | 0.738 | 2       | 2.409         |
| Alkyl chloride               | -0.648718161 | 0.914 | 6       | 4.792         |
| Aryl fluoride                | 0.189519368  | 0.528 | 4       | 1.434         |
| Aryl chloride                | -0.050947804 | 0.029 | 6       | 3.657         |
| Aryl bromide                 | 0.166433277  | 0.279 | 2       | 1.012         |

**Table S5: (continued)**

| Functional group                                           | slope        | $R^2$ | max. FG | $\Delta$ SHAP |
|------------------------------------------------------------|--------------|-------|---------|---------------|
| Carboxylic acid derivative                                 | -1.361323191 | 0.859 | 5       | 12.001        |
| Lactam                                                     | 0.315500889  | 0.609 | 1       | 0.908         |
| Carbonitrile                                               | -1.334673399 | 0.882 | 2       | 4.371         |
| Oxo(het)arene                                              | -0.73534747  | 0.812 | 2       | 2.147         |
| Thioxo(het)arene                                           | 0.057822369  | 0.028 | 2       | 1.586         |
| Orthocarboxylic acid derivative                            | 0.255828151  | 0.280 | 2       | 1.487         |
| Carbamic acid derivative & Carbamic acid ester (Urethane)  | -1.410363777 | 0.865 | 2       | 4.426         |
| Thiocarbamic acid derivative                               | -0.207981271 | 0.733 | 1       | 0.449         |
| Thiocarbamic acid                                          | 0.370398128  | 0.876 | 1       | 0.721         |
| Nitro compound                                             | -0.719626005 | 0.877 | 2       | 2.515         |
| Sulfuric acid derivative                                   | -2.204580328 | 0.953 | 1       | 3.087         |
| Sulfonic acid derivative                                   | -3.342756898 | 0.978 | 2       | 8.683         |
| Thiophosphoric acid derivative & Thiophosphoric acid ester | -1.349203033 | 0.964 | 2       | 3.607         |
| Alkene                                                     | -0.428175965 | 0.390 | 2       | 2.963         |
| Alkyne                                                     | -0.262078189 | 0.789 | 2       | 0.844         |
| Aromatic compound                                          | -1.469477984 | 0.878 | 5       | 15.546        |
| Heterocyclic compound                                      | -0.767741679 | 0.816 | 3       | 4.573         |

**Table S6: Slopes for the number of a particular functional groups present vs the SHAP value based on the training set for the XGBoost model**

| Functional group             | slope        | $R^2$ | max. FG | $\Delta$ SHAP |
|------------------------------|--------------|-------|---------|---------------|
| Cation & Anion               | -0.098534500 | 0.205 | 2       | 0.709         |
| Carbonyl ompound             | -0.785091004 | 0.662 | 2       | 2.031         |
| Oxime ether                  | -0.319649505 | 0.580 | 4       | 1.392         |
| Ketene acetal or derivative  | -0.856720000 | 0.993 | 1       | 1.011         |
| Acetal                       | -0.106090702 | 0.184 | 2       | 1.228         |
| Hemiaminal                   | -0.236111525 | 0.583 | 2       | 0.701         |
| Enamine                      | 0.144524181  | 0.765 | 4       | 0.577         |
| Enol                         | -0.318487868 | 0.637 | 2       | 0.677         |
| Enol ether                   | -0.335051043 | 0.963 | 1       | 0.447         |
| Alcohol                      | -0.743179220 | 0.881 | 18      | 10.564        |
| Phenol or Hydroxyheteroarene | 0.101097077  | 0.426 | 2       | 0.382         |
| Dialkyl ether                | 0.019990731  | 0.005 | 2       | 1.505         |
| Alkyl aryl ether             | -0.477384318 | 0.656 | 4       | 2.250         |
| Diaryl ether                 | -0.140197415 | 0.176 | 2       | 1.647         |
| Hydrazine derivative         | -0.736427746 | 0.833 | 1       | 1.169         |
| Primary amine                | -1.143238922 | 0.909 | 2       | 2.524         |
| Tertiary amine               | 0.383752920  | 0.885 | 1       | 0.672         |
| Alkyl fluoride               | -0.494573027 | 0.935 | 2       | 1.225         |
| Alkyl chloride               | -0.089784324 | 0.371 | 6       | 1.141         |
| Aryl fluoride                | 0.176252119  | 0.515 | 4       | 1.492         |
| Aryl chloride                | -0.128231275 | 0.097 | 6       | 2.076         |
| Aryl bromide                 | 0.030147923  | 0.160 | 2       | 0.224         |
| Carboxylic acid derivative   | -0.953588977 | 0.815 | 5       | 6.313         |

**Table S6: (continued)**

| Functional group                                           | slope        | $R^2$ | max. FG | $\Delta$ SHAP |
|------------------------------------------------------------|--------------|-------|---------|---------------|
| Lactam                                                     | 0.218086651  | 0.565 | 1       | 0.446         |
| Carbonitrile                                               | -0.713590181 | 0.789 | 2       | 1.491         |
| Oxo(het)arene                                              | -0.804565939 | 0.780 | 2       | 2.197         |
| Thioxo(het)arene                                           | 0.039256823  | 0.020 | 2       | 1.105         |
| Orthocarboxylic acid derivative                            | 0.281045382  | 0.483 | 2       | 0.939         |
| Carbamic acid derivative & Carbamic acid ester (Urethane)  | -1.057390689 | 0.637 | 2       | 4.274         |
| Thiocarbamic acid derivative                               | 0.283824509  | 0.731 | 1       | 0.503         |
| Thiocarbamic acid                                          | 0.236863882  | 0.783 | 1       | 0.643         |
| Nitro compound                                             | -0.306187744 | 0.680 | 2       | 1.110         |
| Sulfuric acid derivative                                   | -1.608049591 | 0.949 | 1       | 1.942         |
| Sulfonic acid derivative                                   | -2.740670903 | 0.968 | 2       | 5.165         |
| Thiophosphoric acid derivative & Thiophosphoric acid ester | -0.677722118 | 0.827 | 2       | 2.028         |
| Alkene                                                     | -0.136939744 | 0.280 | 2       | 1.288         |
| Alkyne                                                     | 0.010914247  | 0.081 | 2       | 0.121         |
| Aromatic compound                                          | -0.770697016 | 0.691 | 5       | 4.865         |
| Heterocyclic compound                                      | -0.617153813 | 0.704 | 3       | 3.692         |

## References

- (S1) Haider, N. Checkmol/Matchmol Homepage. 2018; <https://homepage.univie.ac.at/norbert.haider/cheminf/cmmm.html>.
